# Supplementary material for: Infertility network and hub genes for nonobstructive azoospermia utilizing integrative analysis
Source: Aging (Albany NY). 2021 Feb 17;13(5):7052–66. doi: 10.18632/aging.202559 (PMC7993690; doi:10.18632/aging.202559)
Supplement: Supplementary Table 1 [file aging-13-202559-s002.xlsx]

## Sheet: DEGs_45885(log2FC>2,p<0.05)
Supplementary Table 1. Summary table of all DEGs (|log2fold change|≥2, p-value < 0.05) in NOA.
ID	logFC	AveExpr	t	P.Value	adj.P.Val	B	symbols	EntrezID
8067942	2.65557	6.12289	5.82071	2.44e-06	0.000126367	4.77117	MIR99A	407055
7971661	2.21568	5.47699	6.7803	1.75e-07	2.4e-05	7.31159	MIR15A	406948
8038427	-2.00395	5.34264	-6.87055	1.37e-07	2.04e-05	7.5461	TSKS	60385
8003607	-2.00553	6.28753	-4.2928	0.000174348	0.00241785	0.667324	C17orf97	400566
7984759	-2.0144	5.67471	-4.51861	9.31e-05	0.00151562	1.2672	TBC1D21	161514
8160792	-2.02044	5.77938	-4.10872	0.000289654	0.00355438	0.183025	C9orf24	84688
8158902	-2.02279	5.17783	-5.82939	2.38e-06	0.000124908	4.79444	CFAP77	389799
8146051	-2.02311	5.0364	-2.13394	0.0412741	0.142504	-4.40098	ADAM5	255926
8166817	-2.02596	5.81627	-4.11679	0.000283305	0.00349248	0.204143	MPC1L	347411
7963084	-2.03043	5.35537	-4.54619	8.62e-05	0.00143081	1.3408	FAM186B	84070
7994730	-2.03172	4.8934	-4.66445	6.2e-05	0.00113557	1.65721	C16orf92	146378
8071554	-2.03674	5.45041	-8.30093	3.27e-09	2.92e-06	11.1283	CCDC116	164592
7899911	-2.03938	5.8902	-2.49833	0.0182832	0.078816	-3.68082	C1orf94	84970
8143463	-2.04496	4.90993	-2.7506	0.0100569	0.0505075	-3.13983	PRSS37	136242
8028119	-2.04527	7.20641	-3.30903	0.00247181	0.017834	-1.84264	WDR62	284403
8020653	-2.04563	8.76568	-2.6935	0.0115393	0.0559391	-3.26503	CABYR	26256
7999396	-2.04655	6.79291	-3.4139	0.00188002	0.0144704	-1.58642	TEKT5	146279
7906527	-2.04661	4.36211	-7.42368	3.14e-08	8.86e-06	8.96275	ATP1A4	480
8027947	-2.05153	6.18654	-3.5675	0.0012532	0.0106802	-1.20521	ZBTB32	27033
8002005	-2.05307	7.46545	-2.49622	0.0183727	0.0790689	-3.6852	KCTD19	146212
8040053	-2.06066	5.62987	-3.42029	0.00184877	0.0143129	-1.5707	ALLC	55821
8141522	-2.06385	6.10731	-4.96381	2.68e-05	0.000629846	2.46201	C7orf61	402573
7971915	-2.07241	6.75498	-2.8912	0.00713158	0.0392496	-2.82515	LOC102723968	102723968
8115516	-2.0737	7.45309	-2.59915	0.0144427	0.0663858	-3.46846	SOX30	11063
7925876	-2.07661	7.09632	-2.58101	0.0150732	0.0685178	-3.50705	PFKP	5214
8009585	-2.07901	6.097	-3.58188	0.00120621	0.0103969	-1.16921	DNAI2	64446
8008040	-2.08048	7.61803	-2.48616	0.0188055	0.0804221	-3.70609	LRRC46	90506
7911941	-2.08451	5.83503	-8.08685	5.63e-09	3.41e-06	10.6096	CHD5	26038
7955184	-2.08818	5.80807	-5.58779	4.67e-06	0.000191572	4.14503	PRPH	5630
7901219	-2.09106	7.33419	-7.4749	2.74e-08	8.3e-06	9.09202	NSUN4	387338
8017365	-2.09428	7.21764	-2.69192	0.011583	0.0561151	-3.26847	MARCHF10	162333
8143486	-2.09758	4.98874	-2.92493	0.00656023	0.0367985	-2.74836	PRSS58	136541
8043747	-2.09802	5.50882	-3.60216	0.0011428	0.00998472	-1.11832	VWA3B	200403
7903851	-2.10154	4.63851	-5.48748	6.18e-06	0.000231611	3.87477	UBL4B	164153
7959834	-2.10746	5.80801	-4.75824	4.77e-05	0.000949388	1.90884	GLT1D1	144423
8137437	-2.11121	4.73868	-2.99902	0.00545358	0.0322421	-2.57804	GALNTL5	168391
8033097	-2.11699	7.66882	-3.53688	0.00135933	0.0113606	-1.28175	RFX2	5990
8003926	-2.11831	5.74615	-4.78408	4.44e-05	0.000898727	1.97828	ZMYND15	84225
8087653	-2.12202	7.74258	-2.51669	0.0175202	0.0763574	-3.64254	ZMYND10	51364
8035435	-2.12284	5.92913	-8.26659	3.57e-09	2.92e-06	11.0455	IQCN	80726
8135181	-2.12484	8.53878	-2.61843	0.0137991	0.0641448	-3.42723	LRWD1	222229
7915351	-2.13048	5.1615	-6.81942	1.57e-07	2.26e-05	7.41335	SLFNL1	200172
8074153	-2.1308	6.65618	-2.61466	0.0139227	0.0646112	-3.4353	ACR	49
8101839	-2.13226	5.29641	-3.25656	0.00283146	0.0196995	-1.96949	EIF4E	1977
8008350	-2.13628	6.47856	-3.04412	0.00486925	0.0295375	-2.47328	MYCBPAP	84073
8111124	-2.1397	6.05907	-2.72013	0.0108243	0.0534345	-3.20684	MARCHF11	441061
7976425	-2.14004	6.11036	-4.60637	7.29e-05	0.00127315	1.50169	OTUB2	78990
7907633	-2.14281	3.9527	-4.85132	3.68e-05	0.000789297	2.15908	TEX35	84066
7937263	-2.14601	4.8006	-6.2325	7.8e-07	6.1e-05	5.8706	ODF3	113746
7994928	-2.14787	7.94637	-4.44593	0.000114009	0.00176483	1.07351	PHKG2	5261
8135933	-2.15633	6.30673	-4.73181	5.14e-05	0.00100067	1.83789	FAM71F2	346653
8055952	-2.15872	5.51349	-8.85784	8.18e-10	1.43e-06	12.4469	NR4A2	4929
8037688	-2.1591	6.41292	-5.08779	1.89e-05	0.000489842	2.79632	RSPH6A	81492
7952797	-2.16715	5.00759	-3.50264	0.00148826	0.0121606	-1.36699	SPATA19	219938
8081822	-2.17505	4.47222	-3.11611	0.00405813	0.0257673	-2.30442	TEX55	152405
8075981	-2.17651	7.03601	-2.34009	0.0262373	0.102779	-4.00306	C22orf23	84645
8066521	-2.17992	5.44082	-3.25345	0.00285433	0.0198084	-1.97699	TP53TG5	27296
7994109	-2.18445	7.76138	-3.00752	0.00533861	0.0317372	-2.55836	PLK1	5347
7920642	-2.18563	5.55269	-7.35098	3.8e-08	9.82e-06	8.77869	MUC1	4582
8037186	-2.18613	7.0126	-4.63781	6.68e-05	0.00119119	1.58583	LIPE	3991
7985963	-2.1893	5.07249	-3.49105	0.00153452	0.012444	-1.39577	TTLL13P	440307
8092348	-2.19235	6.35297	-3.28057	0.00266103	0.0188882	-1.91155	LAMP3	27074
8008388	-2.20381	7.89884	-5.5498	5.19e-06	0.000207906	4.0427	SPATA20	64847
8160906	-2.21199	4.5441	-2.94763	0.0062005	0.0353113	-2.69643	FAM205C	100129969
7922804	-2.22302	4.70213	-2.62576	0.0135617	0.0633775	-3.41153	APOBEC4	403314
8115481	-2.22683	5.2352	-3.50413	0.00148241	0.0121396	-1.36329	FAM71B	153745
8107970	-2.23289	4.92142	-4.97635	2.59e-05	0.000611541	2.49581	IL13	3596
8024885	-2.23596	4.71356	-8.53067	1.84e-09	2.27e-06	11.6777	TNFAIP8L1	126282
7978756	-2.2366	3.90431	-4.56139	8.27e-05	0.00139438	1.38141	FSCB	84075
8124495	-2.23967	5.36256	-2.55651	0.0159653	0.0714704	-3.55891	POM121L2	94026
7960642	-2.24775	8.27257	-2.69099	0.0116089	0.0562161	-3.2705	ACRBP	84519
7976412	-2.25284	4.8323	-5.33531	9.47e-06	0.000305693	3.4643	CCDC197	256369
8123398	-2.25317	5.52847	-2.86031	0.0076956	0.0415435	-2.89504	TTLL2	83887
8018872	-2.25866	6.22883	-3.78351	0.000702592	0.00690885	-0.658681	DNAH17	8632
8007530	-2.26566	5.77575	-2.5175	0.0174871	0.0762585	-3.64084	CFAP97D1	284067
7897128	-2.26961	6.20082	-4.64144	6.61e-05	0.00118317	1.59556	ACTRT2	140625
8082298	-2.27112	5.49443	-7.08726	7.66e-08	1.42e-05	8.10546	NUP210P1	255330
7982552	-2.28188	5.50375	-2.6071	0.0141739	0.065385	-3.45148	TMCO5A	145942
8007454	-2.28503	7.62076	-5.19226	1.41e-05	0.00040062	3.07823	RND2	8153
8119951	-2.28505	6.10967	-2.7074	0.0111606	0.0546732	-3.23468	CAPN11	11131
8147132	-2.29765	6.15181	-3.68317	0.000920302	0.00849315	-0.913967	CA2	760
8039474	-2.30218	4.44284	-10.4581	1.92e-11	9.95e-08	15.9838	FAM71E2	284418
7949679	-2.30264	6.11779	-5.64502	3.98e-06	0.000173764	4.29909	SPTBN2	6712
8063601	-2.30706	7.43238	-2.47682	0.0192158	0.0816114	-3.72544	C20orf85	128602
8095484	-2.31201	4.57365	-2.42538	0.0216255	0.0891661	-3.8311	CABS1	85438
7975191	-2.31927	4.85653	-3.33581	0.00230556	0.0169467	-1.77754	FAM71D	161142
8028341	-2.32489	6.81889	-3.81529	0.000644783	0.00651771	-0.577355	CATSPERG	57828
7960340	-2.32588	5.94741	-4.55631	8.38e-05	0.00140358	1.36785	FOXM1	2305
8036883	-2.3326	5.88075	-6.4735	4.03e-07	4.04e-05	6.50804	HIPK4	147746
8038246	-2.33851	5.95296	-3.30089	0.00252458	0.01814	-1.86238	TULP2	7288
8039362	-2.33907	7.57407	-3.31846	0.00241195	0.0175236	-1.81972	DNAAF3	352909
7996117	-2.33933	6.89579	-3.14738	0.00374751	0.0242717	-2.23047	DRC7	84229
8126674	-2.34966	7.41126	-2.96713	0.00590638	0.0339898	-2.65164	TCTE1	202500
7993024	-2.35244	6.55775	-3.04194	0.00489605	0.0296569	-2.47835	C16orf71	146562
8032232	-2.35267	7.12106	-5.37864	8.39e-06	0.000282335	3.58122	PCSK4	54760
8080640	-2.35433	5.19186	-2.82045	0.00848564	0.0446502	-2.9846	SPATA12	353324
8125134	-2.35643	6.6186	-4.20021	0.000225172	0.0029253	0.423108	HSPA1L	3305
8126916	-2.37466	5.58908	-2.58948	0.0147756	0.0675152	-3.48904	PGK2	5232
8036069	-2.37549	5.58783	-5.63853	4.05e-06	0.000175787	4.28163	FAM187B	148109
7940253	-2.37616	5.04859	-3.37441	0.00208473	0.0156376	-1.68329	MS4A6E	245802
8025858	-2.37636	4.62761	-3.9002	0.000512178	0.00547265	-0.359013	TSPAN16	26526
8043040	-2.37749	5.32419	-4.22206	0.000211996	0.00279835	0.480642	FUNDC2P2	388965
8165032	-2.37974	3.67102	-7.19285	5.78e-08	1.21e-05	8.37604	GLT6D1	360203
8019280	-2.38574	8.57746	-3.59171	0.00117504	0.0101889	-1.14454	PCYT2	5833
8001682	-2.38691	5.49353	-3.96295	0.000431721	0.00481898	-0.196713	PRSS54	221191
8025868	-2.38715	5.36699	-6.50358	3.71e-07	3.83e-05	6.58722	CCDC159	126075
8065563	-2.38878	3.74337	-4.06513	0.000326469	0.00388925	0.0690792	DEFB121	245934
7906973	-2.39059	5.09842	-4.40765	0.000126803	0.00189504	0.971735	LRRC52	440699
8065652	-2.39151	4.86881	-4.71309	5.41e-05	0.00103568	1.78764	SUN5	140732
7900076	-2.39279	5.63901	-4.07912	0.000314181	0.0037765	0.105609	TEKT2	27285
8095021	-2.39887	7.06947	-4.10298	0.000294259	0.0035969	0.167999	SPATA18	132671
8018761	-2.40081	6.86188	-5.82162	2.43e-06	0.000126244	4.7736	ST6GALNAC2	10610
7952249	-2.40587	8.02592	-4.30091	0.000170481	0.00238009	0.688752	USP2	9099
8013747	-2.40597	5.99701	-5.49736	6.02e-06	0.000227603	3.9014	PROCA1	147011
8007169	-2.4161	5.18233	-3.76883	0.000730984	0.00711866	-0.696184	KLHL10	317719
8043639	-2.41914	5.86937	-7.39092	3.42e-08	9.34e-06	8.87988	FER1L5	90342
7932864	-2.43684	4.75553	-3.27412	0.00270584	0.0191166	-1.92714	LYZL2	119180
8008544	-2.44352	5.86619	-5.10843	1.79e-05	0.00046997	2.852	KIF2B	84643
8037079	-2.45418	8.57584	-2.94529	0.00623658	0.035461	-2.70178	ATP1A3	478
8144577	-2.45525	5.70005	-5.61467	4.33e-06	0.000183592	4.21741	C8orf74	203076
7952503	-2.46248	6.36179	-2.71436	0.0109755	0.0540402	-3.21946	ACRV1	56
8126891	-2.4649	6.40343	-2.18145	0.0372502	0.132493	-4.31158	CRISP2	7180
8085283	-2.46525	6.98833	-3.62618	0.00107188	0.00951239	-1.0579	FANCD2OS	115795
8014334	-2.4693	4.49936	-4.62364	6.95e-05	0.00122675	1.54791	LYZL6	57151
8118981	-2.49481	5.74067	-5.19398	1.41e-05	0.000399031	3.08288	ARMC12	221481
7975154	-2.51348	5.0879	-2.12869	0.0417412	0.143699	-4.41076	CCDC196	440184
7918606	-2.52636	6.07087	-6.68486	2.26e-07	2.87e-05	7.06263	PPM1J	333926
7950142	-2.52718	7.28688	-5.48528	6.22e-06	0.000232518	3.86883	CLPB	81570
7897966	-2.52737	6.11991	-2.57668	0.0152275	0.0690022	-3.51624	C1orf158	93190
7970150	-2.53235	5.52143	-3.55332	0.00130132	0.010978	-1.2407	SPACA7	122258
8030292	-2.53467	7.57	-2.31974	0.0274619	0.106236	-4.04347	DKKL1	27120
8122452	-2.53487	5.50486	-2.82392	0.00841399	0.0443784	-2.97683	ZC2HC1B	153918
8160278	-2.54547	6.2394	-3.20506	0.00323303	0.0217739	-2.09311	SAXO1	158297
8134856	-2.54875	5.80726	-5.74148	3.04e-06	0.000146189	4.55846	FBXO24	26261
8012908	-2.55067	5.69831	-2.90694	0.00685936	0.0380787	-2.78938	TEKT3	64518
7913965	-2.55128	5.53345	-6.56803	3.11e-07	3.44e-05	6.75662	ZNF683	257101
8042558	-2.56702	5.47233	-7.76169	1.3e-08	5.23e-06	9.80953	ANKRD53	79998
8071662	-2.5731	7.19164	-3.42956	0.00180429	0.0140697	-1.54785	GGTLC2	91227
7946082	-2.57705	5.7376	-4.89214	3.28e-05	0.000721109	2.26896	UBQLNL	143630
7949553	-2.58215	5.90861	-4.69537	5.69e-05	0.00107467	1.74011	CATSPER1	117144
7955297	-2.58559	7.83855	-2.64976	0.0128103	0.0606231	-3.35989	AQP5	362
8016866	-2.59307	5.22241	-3.32151	0.00239294	0.0174083	-1.81232	CCDC182	101927581
7901175	-2.6215	5.70625	-2.98331	0.00567234	0.0330542	-2.61434	TSPAN1	10103
8024934	-2.62318	5.51207	-5.85824	2.2e-06	0.000118406	4.8718	ZNRF4	148066
7921895	-2.64065	6.57374	-3.31596	0.0024277	0.0175982	-1.82581	SPATA46	284680
7934166	-2.67754	5.19006	-5.52917	5.5e-06	0.000215835	3.98713	TBATA	219793
8110518	-2.68167	5.94808	-3.81114	0.000652051	0.00656726	-0.587975	C5orf60	285679
8025169	-2.68238	5.16177	-7.23471	5.17e-08	1.14e-05	8.48292	TEX45	374877
7954240	-2.71371	4.71153	-2.97402	0.00580564	0.0335842	-2.63578	CAPZA3	93661
8136217	-2.71641	4.57652	-5.84641	2.27e-06	0.000120459	4.8401	CPA5	93979
8136832	-2.72671	5.76979	-4.4153	0.000124138	0.00187586	0.99206	LLCFC1	135927
8109572	-2.7295	5.76484	-3.66581	0.000964112	0.00877345	-0.95789	C5orf52	100190949
8098368	-2.73104	5.37341	-3.12383	0.00397917	0.0254064	-2.28618	ADAM29	11086
8008664	-2.73855	7.29931	-4.51435	9.42e-05	0.00153072	1.25583	AKAP1	8165
7974425	-2.7441	6.39799	-4.09124	0.000303897	0.00367558	0.137302	SAMD4A	23034
7992409	-2.76163	6.10162	-4.3005	0.000170673	0.00238177	0.687674	RNF151	146310
8135945	-2.76562	6.37729	-3.66186	0.000974358	0.00884011	-0.967872	FAM71F1	84691
8115274	-2.77576	4.4332	-5.01319	2.34e-05	0.000566274	2.59511	SLC36A3	285641
7994267	-2.77898	6.87219	-4.95306	2.76e-05	0.000643177	2.43303	C16orf82	162083
7957790	-2.80201	4.92238	-4.77259	4.58e-05	0.000921938	1.9474	FAM71C	196472
8133366	-2.81489	6.51471	-2.92259	0.00659844	0.0369506	-2.75371	TMEM270	135886
7985025	-2.8293	5.19898	-5.93785	1.76e-06	0.000102586	5.08503	ODF3L1	161753
8155200	-2.83914	4.89922	-3.89493	0.000519565	0.00553245	-0.372603	CCIN	881
8083053	-2.8477	4.52505	-6.55228	3.25e-07	3.52e-05	6.71525	TRIM42	287015
7899790	-2.85112	6.12814	-4.24765	0.000197533	0.00265748	0.54809	TSSK3	81629
8119515	-2.88505	4.85598	-5.20581	1.36e-05	0.00038922	3.11479	GUCA1A	2978
7927294	-2.89597	4.88272	-5.48152	6.29e-06	0.000233406	3.85869	ANTXRL	195977
8064464	-2.90398	5.636	-4.25938	0.000191233	0.0025958	0.579036	SIRPD	128646
8049079	-2.90843	5.0484	-6.31402	6.24e-07	5.36e-05	6.08679	TEX44	165100
7940493	-2.9118	6.72267	-5.20561	1.36e-05	0.00038922	3.11426	PPP1R32	220004
8157818	-2.91684	6.03136	-7.25666	4.88e-08	1.11e-05	8.53889	WDR38	401551
8090388	-2.91839	6.17025	-3.7846	0.000700522	0.00689485	-0.655887	C3orf22	152065
8035684	-2.92542	5.026	-5.52266	5.6e-06	0.000218002	3.96959	TSSK6	83983
7905474	-2.95119	5.9688	-3.17426	0.00349867	0.0230847	-2.1666	OAZ3	51686
8159646	-2.95344	6.32	-5.52942	5.5e-06	0.000215835	3.9878	STPG3	441476
8020123	-2.95553	4.85221	-5.42148	7.44e-06	0.000259886	3.69677	TXNDC2	84203
8029318	-2.96522	6.11459	-3.79276	0.000685263	0.00680095	-0.635032	IRGC	56269
7995442	-3.00061	4.67522	-3.67617	0.000937735	0.00860159	-0.931692	C16orf78	123970
8172660	-3.00233	6.6201	-2.71557	0.0109437	0.0539122	-3.21683	AKAP4	8852
7926889	-3.0101	3.87829	-5.90664	1.92e-06	0.000108458	5.00148	LYZL1	84569
8004400	-3.03166	6.77107	-4.02033	0.000369089	0.00427909	-0.047687	SPEM2	201243
7999435	-3.0506	8.7011	-2.25942	0.0314028	0.11679	-4.16182	PRM2	5620
8107576	-3.05154	6.12051	-3.07954	0.00445263	0.02765	-2.39045	FTMT	94033
8093074	-3.07333	6.41115	-5.24401	1.22e-05	0.000360307	3.2179	ZDHHC19	131540
8032023	-3.07637	5.63568	-6.85668	1.42e-07	2.08e-05	7.51011	THEG	51298
7973142	-3.08142	5.82347	-4.25913	0.000191363	0.00259649	0.578391	TPPP2	122664
8058866	-3.09054	7.13363	-2.1312	0.0415176	0.143062	-4.40609	TNP1	7141
8016540	-3.1027	5.78943	-4.59999	7.42e-05	0.00128659	1.48462	PHOSPHO1	162466
8169056	-3.10899	6.3261	-3.75126	0.000766431	0.00737568	-0.740996	TMEM31	203562
8165498	-3.11991	6.27508	-4.83085	3.89e-05	0.000819865	2.10402	FAM166A	401565
8173437	-3.12212	4.73526	-4.95392	2.76e-05	0.000642117	2.43536	CXorf65	158830
7905530	-3.13658	6.19373	-3.6015	0.00114479	0.00999428	-1.11996	SMCP	4184
8036494	-3.14632	7.33862	-3.82331	0.000630938	0.0064089	-0.556788	GGN	199720
7968957	-3.16343	4.2576	-5.77973	2.74e-06	0.000136334	4.66118	CBY2	220082
8154973	-3.16723	5.31143	-5.98837	1.53e-06	9.55e-05	5.22016	C9orf131	138724
8025011	-3.16747	5.79314	-3.26147	0.00279578	0.0195657	-1.95766	ACSBG2	81616
8030076	-3.19152	5.86239	-3.89627	0.000517674	0.00551407	-0.369141	SPACA4	171169
7961399	-3.23154	7.08585	-2.94591	0.00622709	0.035413	-2.70037	GSG1	83445
8049007	-3.23464	6.80772	-3.40258	0.00193664	0.0148138	-1.61424	SPATA3	130560
7901253	-3.24314	5.48807	-3.83621	0.000609284	0.00626732	-0.523687	TEX38	374973
8066384	-3.25941	7.05348	-2.32476	0.0271553	0.105364	-4.03353	GTSF1L	149699
8061122	-3.27968	5.81661	-2.89103	0.00713451	0.0392592	-2.82553	BANF2	140836
8147717	-3.30358	6.98157	-2.94191	0.00628929	0.0356633	-2.70953	ODF1	4956
8040815	-3.30888	7.39927	-3.57395	0.0012319	0.0105528	-1.18907	ABHD1	84696
8061869	-3.35988	7.07257	-3.48167	0.00157303	0.0126821	-1.41906	BPIFA3	128861
8027864	-3.3766	5.41973	-4.47269	0.000105831	0.00167404	1.14476	GAPDHS	26330
8051024	-3.40133	6.20519	-5.75341	2.94e-06	0.00014244	4.59049	PRR30	339779
8157141	-3.49265	7.58171	-3.16139	0.00361576	0.0236484	-2.19721	ACTL7A	10881
7946078	-3.52478	7.0612	-3.25612	0.00283469	0.019709	-1.97055	UBQLN3	50613
7929674	-3.56395	6.49841	-3.3333	0.00232069	0.0170315	-1.78365	C10orf62	414157
8006504	-3.61531	6.00471	-3.52923	0.00138713	0.0115324	-1.30081	FNDC8	54752
7999440	-3.6489	9.04163	-2.37006	0.0245232	0.0978139	-3.9431	PRM1	5619
7905559	-3.90492	7.50124	-3.50138	0.00149325	0.0121865	-1.37014	LELP1	149018
8135865	-3.91742	6.63052	-3.36109	0.00215854	0.0160753	-1.71587	FSCN3	29999
