# Supplementary material for: Infertility network and hub genes for nonobstructive azoospermia utilizing integrative analysis
Source: Aging (Albany NY). 2021 Feb 17;13(5):7052–66. doi: 10.18632/aging.202559 (PMC7993690; doi:10.18632/aging.202559)
Supplement: Supplementary Table 2 [file aging-13-202559-s003.xlsx]

## Sheet: Annotation
Supplementary Table 2. The GO enrichment analysis summary table based on all DEGs.
MyList	Gene ID	Type	Tax ID	Homologene Gene ID	Homologene Gene Tax ID	GO:0097223 sperm part	GO:0007283 spermatogenesis	GO:0031514 motile cilium	GO:0009566 fertilization	GO:0003341 cilium movement	GO:0007341 penetration of zona pellucida	GO:0035686 sperm fibrous sheath	GO:0003796 lysozyme activity	GO:0035092 sperm chromatin condensation	hsa04964 Proximal tubule bicarbonate re
MIR99A	407055	symbol	H. sapiens	407055	H. sapiens	0	0	0	0	0	0	0	0	0	0
MIR15A	406948	symbol	H. sapiens	406948	H. sapiens	0	0	0	0	0	0	0	0	0	0
TSKS	60385	symbol	H. sapiens	60385	H. sapiens	0	0	0	0	0	0	0	0	0	0
C17orf97	400566	symbol	H. sapiens	400566	H. sapiens	0	0	0	0	0	0	0	0	0	0
TBC1D21	161514	symbol	H. sapiens	161514	H. sapiens	1	1	0	0	1	0	0	0	0	0
C9orf24	84688	symbol	H. sapiens	84688	H. sapiens	0	1	0	0	0	0	0	0	0	0
CFAP77	389799	symbol	H. sapiens	389799	H. sapiens	0	0	1	0	0	0	0	0	0	0
ADAM5	255926	symbol	H. sapiens	255926	H. sapiens	0	0	0	0	0	0	0	0	0	0
MPC1L	347411	symbol	H. sapiens	347411	H. sapiens	0	0	0	0	0	0	0	0	0	0
FAM186B	84070	symbol	H. sapiens	84070	H. sapiens	0	0	0	0	0	0	0	0	0	0
C16orf92	146378	symbol	H. sapiens	146378	H. sapiens	0	0	0	0	0	0	0	0	0	0
CCDC116	164592	symbol	H. sapiens	164592	H. sapiens	0	0	0	0	0	0	0	0	0	0
C1orf94	84970	symbol	H. sapiens	84970	H. sapiens	0	0	0	0	0	0	0	0	0	0
PRSS37	136242	symbol	H. sapiens	136242	H. sapiens	1	0	0	1	0	0	0	0	0	0
WDR62	284403	symbol	H. sapiens	284403	H. sapiens	0	0	0	0	1	0	0	0	0	0
CABYR	26256	symbol	H. sapiens	26256	H. sapiens	1	1	1	0	1	0	1	0	0	0
TEKT5	146279	symbol	H. sapiens	146279	H. sapiens	1	0	1	0	1	0	0	0	0	0
ATP1A4	480	symbol	H. sapiens	480	H. sapiens	1	1	1	1	0	0	0	0	0	1
ZBTB32	27033	symbol	H. sapiens	27033	H. sapiens	0	0	0	0	0	0	0	0	0	0
KCTD19	146212	symbol	H. sapiens	146212	H. sapiens	0	0	0	0	0	0	0	0	0	0
ALLC	55821	symbol	H. sapiens	55821	H. sapiens	0	0	0	0	0	0	0	0	0	0
C7orf61	402573	symbol	H. sapiens	402573	H. sapiens	0	0	0	0	0	0	0	0	0	0
LOC102723968	102723968	Gene_ID	H. sapiens	102723968	H. sapiens	0	0	0	0	0	0	0	0	0	0
SOX30	11063	symbol	H. sapiens	11063	H. sapiens	0	1	0	0	0	0	0	0	0	0
PFKP	5214	symbol	H. sapiens	5214	H. sapiens	0	0	0	0	0	0	0	0	0	0
DNAI2	64446	symbol	H. sapiens	64446	H. sapiens	1	0	1	0	1	0	0	0	0	0
LRRC46	90506	symbol	H. sapiens	90506	H. sapiens	0	0	0	0	0	0	0	0	0	0
CHD5	26038	symbol	H. sapiens	26038	H. sapiens	0	1	0	0	0	0	0	0	1	0
PRPH	5630	symbol	H. sapiens	5630	H. sapiens	0	0	0	0	0	0	0	0	0	0
NSUN4	387338	symbol	H. sapiens	387338	H. sapiens	0	0	0	0	0	0	0	0	0	0
MARCHF10	162333	symbol	H. sapiens	162333	H. sapiens	0	0	0	0	0	0	0	0	0	0
PRSS58	136541	symbol	H. sapiens	136541	H. sapiens	0	0	0	1	0	0	0	0	0	0
VWA3B	200403	symbol	H. sapiens	200403	H. sapiens	0	0	0	0	0	0	0	0	0	0
UBL4B	164153	symbol	H. sapiens	164153	H. sapiens	0	0	0	0	0	0	0	0	0	0
GLT1D1	144423	symbol	H. sapiens	144423	H. sapiens	0	0	0	0	0	0	0	0	0	0
GALNTL5	168391	symbol	H. sapiens	168391	H. sapiens	0	1	0	0	0	0	0	0	0	0
RFX2	5990	symbol	H. sapiens	5990	H. sapiens	0	1	0	0	1	0	0	0	0	0
ZMYND15	84225	symbol	H. sapiens	84225	H. sapiens	0	1	0	0	0	0	0	0	0	0
ZMYND10	51364	symbol	H. sapiens	51364	H. sapiens	0	0	0	0	1	0	1	0	0	0
IQCN	80726	symbol	H. sapiens	80726	H. sapiens	0	0	0	0	0	0	0	0	0	0
LRWD1	222229	symbol	H. sapiens	222229	H. sapiens	0	0	0	0	0	0	0	0	0	0
SLFNL1	200172	symbol	H. sapiens	200172	H. sapiens	0	0	0	0	0	0	0	0	0	0
ACR	49	symbol	H. sapiens	49	H. sapiens	1	0	0	1	0	1	0	0	0	0
EIF4E	1977	symbol	H. sapiens	1977	H. sapiens	0	0	0	0	0	0	0	0	0	0
MYCBPAP	84073	symbol	H. sapiens	84073	H. sapiens	0	1	0	0	0	0	0	0	0	0
MARCHF11	441061	symbol	H. sapiens	441061	H. sapiens	0	0	0	0	0	0	0	0	0	0
OTUB2	78990	symbol	H. sapiens	78990	H. sapiens	0	0	0	0	0	0	0	0	0	0
TEX35	84066	symbol	H. sapiens	84066	H. sapiens	0	0	0	0	0	0	0	0	0	0
ODF3	113746	symbol	H. sapiens	113746	H. sapiens	1	1	1	0	0	0	0	0	0	0
PHKG2	5261	symbol	H. sapiens	5261	H. sapiens	0	0	0	0	0	0	0	0	0	0
FAM71F2	346653	symbol	H. sapiens	346653	H. sapiens	0	0	0	0	0	0	0	0	0	0
NR4A2	4929	symbol	H. sapiens	4929	H. sapiens	0	0	0	0	0	0	0	0	0	0
RSPH6A	81492	symbol	H. sapiens	81492	H. sapiens	0	0	1	0	1	0	0	0	0	0
SPATA19	219938	symbol	H. sapiens	219938	H. sapiens	0	1	0	0	0	0	0	0	0	0
TEX55	152405	symbol	H. sapiens	152405	H. sapiens	0	0	0	0	0	0	0	0	0	0
C22orf23	84645	symbol	H. sapiens	84645	H. sapiens	0	0	0	0	0	0	0	0	0	0
TP53TG5	27296	symbol	H. sapiens	27296	H. sapiens	0	0	0	0	0	0	0	0	0	0
PLK1	5347	symbol	H. sapiens	5347	H. sapiens	0	1	0	0	1	0	0	0	1	0
MUC1	4582	symbol	H. sapiens	4582	H. sapiens	0	0	0	0	0	0	0	0	0	0
LIPE	3991	symbol	H. sapiens	3991	H. sapiens	0	0	0	1	0	0	0	0	0	0
TTLL13P	440307	symbol	H. sapiens	440307	H. sapiens	0	0	0	0	0	0	0	0	0	0
LAMP3	27074	symbol	H. sapiens	27074	H. sapiens	0	0	0	0	0	0	0	0	0	0
SPATA20	64847	symbol	H. sapiens	64847	H. sapiens	0	1	0	0	0	0	0	0	0	0
FAM205C	100129969	symbol	H. sapiens	100129969	H. sapiens	0	0	0	0	0	0	0	0	0	0
APOBEC4	403314	symbol	H. sapiens	403314	H. sapiens	0	0	0	0	0	0	0	0	0	0
FAM71B	153745	symbol	H. sapiens	153745	H. sapiens	0	0	0	0	0	0	0	0	0	0
IL13	3596	symbol	H. sapiens	3596	H. sapiens	0	0	0	0	0	0	0	0	0	0
TNFAIP8L1	126282	symbol	H. sapiens	126282	H. sapiens	0	0	0	0	0	0	0	0	0	0
FSCB	84075	symbol	H. sapiens	84075	H. sapiens	0	0	1	0	0	0	0	0	0	0
POM121L2	94026	symbol	H. sapiens	94026	H. sapiens	0	0	0	0	0	0	0	0	0	0
ACRBP	84519	symbol	H. sapiens	84519	H. sapiens	1	1	0	1	0	0	0	0	0	0
CCDC197	256369	symbol	H. sapiens	256369	H. sapiens	0	0	0	0	0	0	0	0	0	0
TTLL2	83887	symbol	H. sapiens	83887	H. sapiens	0	0	0	0	0	0	0	0	0	0
DNAH17	8632	symbol	H. sapiens	8632	H. sapiens	0	0	1	0	1	0	0	0	0	0
CFAP97D1	284067	symbol	H. sapiens	284067	H. sapiens	0	0	0	0	0	0	0	0	0	0
ACTRT2	140625	symbol	H. sapiens	140625	H. sapiens	0	0	0	0	0	0	0	0	0	0
NUP210P1	255330	symbol	H. sapiens	255330	H. sapiens	0	0	0	0	0	0	0	0	0	0
TMCO5A	145942	symbol	H. sapiens	145942	H. sapiens	0	0	0	0	0	0	0	0	0	0
RND2	8153	symbol	H. sapiens	8153	H. sapiens	1	0	0	0	0	0	0	0	0	0
CAPN11	11131	symbol	H. sapiens	11131	H. sapiens	1	0	0	0	0	0	0	0	0	0
CA2	760	symbol	H. sapiens	760	H. sapiens	0	0	0	0	0	0	0	0	0	1
FAM71E2	284418	symbol	H. sapiens	284418	H. sapiens	0	0	0	0	0	0	0	0	0	0
SPTBN2	6712	symbol	H. sapiens	6712	H. sapiens	0	0	0	0	0	0	0	0	0	0
C20orf85	128602	symbol	H. sapiens	128602	H. sapiens	0	0	0	0	0	0	0	0	0	0
CABS1	85438	symbol	H. sapiens	85438	H. sapiens	0	1	1	0	0	0	0	0	0	0
FAM71D	161142	symbol	H. sapiens	161142	H. sapiens	0	0	0	0	0	0	0	0	0	0
CATSPERG	57828	symbol	H. sapiens	57828	H. sapiens	1	1	1	1	0	0	1	0	0	0
FOXM1	2305	symbol	H. sapiens	2305	H. sapiens	0	0	0	0	0	0	0	0	0	0
HIPK4	147746	symbol	H. sapiens	147746	H. sapiens	0	0	0	0	0	0	0	0	0	0
TULP2	7288	symbol	H. sapiens	7288	H. sapiens	0	0	1	0	0	0	0	0	0	0
DNAAF3	352909	symbol	H. sapiens	352909	H. sapiens	0	0	0	0	1	0	1	0	0	0
DRC7	84229	symbol	H. sapiens	84229	H. sapiens	0	0	1	0	0	0	0	0	0	0
TCTE1	202500	symbol	H. sapiens	202500	H. sapiens	1	0	1	0	0	0	0	0	0	0
C16orf71	146562	symbol	H. sapiens	146562	H. sapiens	0	0	0	0	0	0	0	0	0	0
PCSK4	54760	symbol	H. sapiens	54760	H. sapiens	1	1	0	1	0	0	0	0	0	0
SPATA12	353324	symbol	H. sapiens	353324	H. sapiens	0	0	0	0	0	0	0	0	0	0
HSPA1L	3305	symbol	H. sapiens	3305	H. sapiens	0	0	0	1	0	0	0	0	0	0
PGK2	5232	symbol	H. sapiens	5232	H. sapiens	1	0	1	0	0	0	1	0	0	0
FAM187B	148109	symbol	H. sapiens	148109	H. sapiens	0	0	0	0	0	0	0	0	0	0
MS4A6E	245802	symbol	H. sapiens	245802	H. sapiens	0	0	0	0	0	0	0	0	0	0
TSPAN16	26526	symbol	H. sapiens	26526	H. sapiens	0	0	0	0	0	0	0	0	0	0
FUNDC2P2	388965	symbol	H. sapiens	388965	H. sapiens	0	0	0	0	0	0	0	0	0	0
GLT6D1	360203	symbol	H. sapiens	360203	H. sapiens	0	0	0	0	0	0	0	0	0	0
PCYT2	5833	symbol	H. sapiens	5833	H. sapiens	0	0	0	0	0	0	0	0	0	0
PRSS54	221191	symbol	H. sapiens	221191	H. sapiens	0	0	0	1	0	0	0	0	0	0
CCDC159	126075	symbol	H. sapiens	126075	H. sapiens	0	0	0	0	0	0	0	0	0	0
DEFB121	245934	symbol	H. sapiens	245934	H. sapiens	0	0	0	0	0	0	0	0	0	0
LRRC52	440699	symbol	H. sapiens	440699	H. sapiens	0	0	0	0	0	0	0	0	0	0
SUN5	140732	symbol	H. sapiens	140732	H. sapiens	1	1	1	0	0	0	0	0	1	0
TEKT2	27285	symbol	H. sapiens	27285	H. sapiens	0	0	1	0	1	0	0	0	0	0
SPATA18	132671	symbol	H. sapiens	132671	H. sapiens	0	0	0	0	0	0	0	0	0	0
ST6GALNAC2	10610	symbol	H. sapiens	10610	H. sapiens	0	0	0	0	0	0	0	0	0	0
USP2	9099	symbol	H. sapiens	9099	H. sapiens	0	0	0	0	0	0	0	0	0	0
PROCA1	147011	symbol	H. sapiens	147011	H. sapiens	0	0	0	0	0	0	0	0	0	0
KLHL10	317719	symbol	H. sapiens	317719	H. sapiens	0	1	0	1	0	0	0	0	0	0
FER1L5	90342	symbol	H. sapiens	90342	H. sapiens	0	0	0	0	0	0	0	0	0	0
LYZL2	119180	symbol	H. sapiens	119180	H. sapiens	0	0	0	0	0	0	0	1	0	0
KIF2B	84643	symbol	H. sapiens	84643	H. sapiens	0	0	0	0	1	0	0	0	0	0
ATP1A3	478	symbol	H. sapiens	478	H. sapiens	0	0	0	0	0	0	0	0	0	1
C8orf74	203076	symbol	H. sapiens	203076	H. sapiens	0	0	0	0	0	0	0	0	0	0
ACRV1	56	symbol	H. sapiens	56	H. sapiens	1	0	0	0	0	0	0	0	0	0
CRISP2	7180	symbol	H. sapiens	7180	H. sapiens	0	0	0	0	0	0	0	0	0	0
FANCD2OS	115795	symbol	H. sapiens	115795	H. sapiens	0	0	0	0	0	0	0	0	0	0
LYZL6	57151	symbol	H. sapiens	57151	H. sapiens	1	1	1	1	0	0	0	1	0	0
ARMC12	221481	symbol	H. sapiens	221481	H. sapiens	0	0	0	0	0	0	0	0	0	0
CCDC196	440184	symbol	H. sapiens	440184	H. sapiens	0	0	0	0	0	0	0	0	0	0
PPM1J	333926	symbol	H. sapiens	333926	H. sapiens	0	0	0	0	0	0	0	0	0	0
CLPB	81570	symbol	H. sapiens	81570	H. sapiens	0	0	0	0	0	0	0	0	0	0
C1orf158	93190	symbol	H. sapiens	93190	H. sapiens	0	0	0	0	0	0	0	0	0	0
SPACA7	122258	symbol	H. sapiens	122258	H. sapiens	1	0	0	1	0	0	0	0	0	0
DKKL1	27120	symbol	H. sapiens	27120	H. sapiens	1	0	0	1	0	1	0	0	0	0
ZC2HC1B	153918	symbol	H. sapiens	153918	H. sapiens	0	0	0	0	0	0	0	0	0	0
SAXO1	158297	symbol	H. sapiens	158297	H. sapiens	1	0	1	0	1	0	0	0	0	0
FBXO24	26261	symbol	H. sapiens	26261	H. sapiens	0	0	0	0	0	0	0	0	0	0
TEKT3	64518	symbol	H. sapiens	64518	H. sapiens	1	0	1	0	1	0	0	0	0	0
ZNF683	257101	symbol	H. sapiens	257101	H. sapiens	0	0	0	0	0	0	0	0	0	0
ANKRD53	79998	symbol	H. sapiens	79998	H. sapiens	0	0	0	0	1	0	0	0	0	0
GGTLC2	91227	symbol	H. sapiens	91227	H. sapiens	0	0	0	0	0	0	0	0	0	0
UBQLNL	143630	symbol	H. sapiens	143630	H. sapiens	0	0	0	0	0	0	0	0	0	0
CATSPER1	117144	symbol	H. sapiens	117144	H. sapiens	0	1	1	1	1	0	0	0	0	0
AQP5	362	symbol	H. sapiens	362	H. sapiens	0	0	0	0	0	0	0	0	0	0
CCDC182	101927581	symbol	H. sapiens	101927581	H. sapiens	0	1	0	0	0	0	0	0	0	0
TSPAN1	10103	symbol	H. sapiens	10103	H. sapiens	0	0	0	0	0	0	0	0	0	0
ZNRF4	148066	symbol	H. sapiens	148066	H. sapiens	0	0	0	0	0	0	0	0	0	0
SPATA46	284680	symbol	H. sapiens	284680	H. sapiens	0	1	0	1	0	0	0	0	0	0
TBATA	219793	symbol	H. sapiens	219793	H. sapiens	0	1	0	0	0	0	0	0	0	0
C5orf60	285679	symbol	H. sapiens	285679	H. sapiens	0	0	0	0	0	0	0	0	0	0
TEX45	374877	symbol	H. sapiens	374877	H. sapiens	0	0	0	0	0	0	0	0	0	0
CAPZA3	93661	symbol	H. sapiens	93661	H. sapiens	1	1	0	0	0	0	0	0	0	0
CPA5	93979	symbol	H. sapiens	93979	H. sapiens	0	0	0	0	0	0	0	0	0	0
LLCFC1	135927	symbol	H. sapiens	135927	H. sapiens	0	0	0	0	0	0	0	0	0	0
C5orf52	100190949	symbol	H. sapiens	100190949	H. sapiens	0	0	0	0	0	0	0	0	0	0
ADAM29	11086	symbol	H. sapiens	11086	H. sapiens	0	1	0	0	0	0	0	0	0	0
AKAP1	8165	symbol	H. sapiens	8165	H. sapiens	0	0	0	0	0	0	0	0	0	0
SAMD4A	23034	symbol	H. sapiens	23034	H. sapiens	0	0	0	0	0	0	0	0	0	0
RNF151	146310	symbol	H. sapiens	146310	H. sapiens	0	1	0	0	0	0	0	0	0	0
FAM71F1	84691	symbol	H. sapiens	84691	H. sapiens	0	0	0	0	0	0	0	0	0	0
SLC36A3	285641	symbol	H. sapiens	285641	H. sapiens	0	0	0	0	0	0	0	0	0	0
C16orf82	162083	symbol	H. sapiens	162083	H. sapiens	0	0	0	0	0	0	0	0	0	0
FAM71C	196472	symbol	H. sapiens	196472	H. sapiens	0	0	0	0	0	0	0	0	0	0
TMEM270	135886	symbol	H. sapiens	135886	H. sapiens	0	0	0	0	0	0	0	0	0	0
ODF3L1	161753	symbol	H. sapiens	161753	H. sapiens	0	0	0	0	0	0	0	0	0	0
CCIN	881	symbol	H. sapiens	881	H. sapiens	0	1	0	0	0	0	0	0	0	0
TRIM42	287015	symbol	H. sapiens	287015	H. sapiens	0	0	0	0	0	0	0	0	0	0
TSSK3	81629	symbol	H. sapiens	81629	H. sapiens	0	1	0	0	0	0	0	0	0	0
GUCA1A	2978	symbol	H. sapiens	2978	H. sapiens	0	0	1	0	0	0	0	0	0	0
ANTXRL	195977	symbol	H. sapiens	195977	H. sapiens	0	0	0	0	0	0	0	0	0	0
SIRPD	128646	symbol	H. sapiens	128646	H. sapiens	0	0	0	0	0	0	0	0	0	0
TEX44	165100	symbol	H. sapiens	165100	H. sapiens	0	0	0	0	0	0	0	0	0	0
PPP1R32	220004	symbol	H. sapiens	220004	H. sapiens	0	0	0	0	0	0	0	0	0	0
WDR38	401551	symbol	H. sapiens	401551	H. sapiens	0	0	0	0	0	0	0	0	0	0
C3orf22	152065	symbol	H. sapiens	152065	H. sapiens	0	0	0	0	0	0	0	0	0	0
TSSK6	83983	symbol	H. sapiens	83983	H. sapiens	0	1	0	0	0	0	0	0	1	0
OAZ3	51686	symbol	H. sapiens	51686	H. sapiens	0	1	0	0	0	0	0	0	0	0
STPG3	441476	symbol	H. sapiens	441476	H. sapiens	0	0	0	0	0	0	0	0	0	0
TXNDC2	84203	symbol	H. sapiens	84203	H. sapiens	0	1	0	0	0	0	0	0	0	0
IRGC	56269	symbol	H. sapiens	56269	H. sapiens	0	0	0	0	0	0	0	0	0	0
C16orf78	123970	symbol	H. sapiens	123970	H. sapiens	0	0	0	0	0	0	0	0	0	0
AKAP4	8852	symbol	H. sapiens	8852	H. sapiens	1	0	1	1	1	0	1	0	0	0
LYZL1	84569	symbol	H. sapiens	84569	H. sapiens	0	0	0	0	0	0	0	1	0	0
SPEM2	201243	symbol	H. sapiens	201243	H. sapiens	0	0	0	0	0	0	0	0	0	0
PRM2	5620	symbol	H. sapiens	5620	H. sapiens	0	1	0	0	0	0	0	0	1	0
FTMT	94033	symbol	H. sapiens	94033	H. sapiens	0	0	0	0	0	0	0	0	0	0
ZDHHC19	131540	symbol	H. sapiens	131540	H. sapiens	0	0	0	0	0	0	0	0	0	0
THEG	51298	symbol	H. sapiens	51298	H. sapiens	0	1	0	0	0	0	0	0	0	0
TPPP2	122664	symbol	H. sapiens	122664	H. sapiens	1	1	1	0	1	0	0	0	0	0
TNP1	7141	symbol	H. sapiens	7141	H. sapiens	0	1	1	1	0	0	0	0	1	0
PHOSPHO1	162466	symbol	H. sapiens	162466	H. sapiens	0	0	0	0	0	0	0	0	0	0
TMEM31	203562	symbol	H. sapiens	203562	H. sapiens	0	0	0	0	0	0	0	0	0	0
FAM166A	401565	symbol	H. sapiens	401565	H. sapiens	0	0	0	0	0	0	0	0	0	0
CXorf65	158830	symbol	H. sapiens	158830	H. sapiens	0	0	0	0	0	0	0	0	0	0
SMCP	4184	symbol	H. sapiens	4184	H. sapiens	0	0	1	1	0	1	0	0	0	0
GGN	199720	symbol	H. sapiens	199720	H. sapiens	0	1	0	0	0	0	0	0	0	0
CBY2	220082	symbol	H. sapiens	220082	H. sapiens	0	0	0	0	0	0	0	0	0	0
C9orf131	138724	symbol	H. sapiens	138724	H. sapiens	0	0	0	0	0	0	0	0	0	0
ACSBG2	81616	symbol	H. sapiens	81616	H. sapiens	0	1	0	0	0	0	0	0	0	0
SPACA4	171169	symbol	H. sapiens	171169	H. sapiens	1	0	0	0	0	0	0	0	0	0
GSG1	83445	symbol	H. sapiens	83445	H. sapiens	0	0	0	0	0	0	0	0	0	0
SPATA3	130560	symbol	H. sapiens	130560	H. sapiens	0	0	0	0	0	0	0	0	0	0
TEX38	374973	symbol	H. sapiens	374973	H. sapiens	0	0	0	0	0	0	0	0	0	0
GTSF1L	149699	symbol	H. sapiens	149699	H. sapiens	0	0	0	0	0	0	0	0	0	0
BANF2	140836	symbol	H. sapiens	140836	H. sapiens	0	0	0	0	0	0	0	0	0	0
ODF1	4956	symbol	H. sapiens	4956	H. sapiens	1	1	1	0	0	0	0	0	0	0
ABHD1	84696	symbol	H. sapiens	84696	H. sapiens	0	0	0	0	0	0	0	0	0	0
BPIFA3	128861	symbol	H. sapiens	128861	H. sapiens	0	0	0	0	0	0	0	0	0	0
GAPDHS	26330	symbol	H. sapiens	26330	H. sapiens	0	0	1	0	0	0	0	0	0	0
PRR30	339779	symbol	H. sapiens	339779	H. sapiens	0	0	0	0	0	0	0	0	0	0
ACTL7A	10881	symbol	H. sapiens	10881	H. sapiens	0	0	1	0	0	0	0	0	0	0
UBQLN3	50613	symbol	H. sapiens	50613	H. sapiens	0	0	0	0	0	0	0	0	0	0
C10orf62	414157	symbol	H. sapiens	414157	H. sapiens	0	0	0	0	0	0	0	0	0	0
FNDC8	54752	symbol	H. sapiens	54752	H. sapiens	0	0	0	0	0	0	0	0	0	0
PRM1	137902	gene_synonym	H. sapiens	137902	H. sapiens	0	0	0	0	0	0	0	0	0	0
LELP1	149018	symbol	H. sapiens	149018	H. sapiens	0	0	0	0	0	0	0	0	0	0
FSCN3	29999	symbol	H. sapiens	29999	H. sapiens	0	1	0	0	0	0	0	0	0	0

## Sheet: Enrichment
GroupID	Category	Term	Description	LogP	Log(q-value)	InTerm_InList	Genes	Symbols
1_Summary	GO Cellular Components	GO:0097223	sperm part	-23.718	-19.3554	27/200	49,56,480,4956,5232,8153,8852,11131,26256,27120,54760,57151,57828,64446,64518,84519,93661,113746,122258,122664,136242,140732,146279,158297,161514,171169,202500	ACR,ACRV1,ATP1A4,ODF1,PGK2,RND2,AKAP4,CAPN11,CABYR,DKKL1,PCSK4,LYZL6,CATSPERG,DNAI2,TEKT3,ACRBP,CAPZA3,ODF3,SPACA7,TPPP2,PRSS37,SUN5,TEKT5,SAXO1,TBC1D21,SPACA4,TCTE1
1_Member	GO Cellular Components	GO:0097223	sperm part	-23.718	-19.3554	27/200	49,56,480,4956,5232,8153,8852,11131,26256,27120,54760,57151,57828,64446,64518,84519,93661,113746,122258,122664,136242,140732,146279,158297,161514,171169,202500	ACR,ACRV1,ATP1A4,ODF1,PGK2,RND2,AKAP4,CAPN11,CABYR,DKKL1,PCSK4,LYZL6,CATSPERG,DNAI2,TEKT3,ACRBP,CAPZA3,ODF3,SPACA7,TPPP2,PRSS37,SUN5,TEKT5,SAXO1,TBC1D21,SPACA4,TCTE1
1_Member	GO Cellular Components	GO:0001669	acrosomal vesicle	-10.9331	-7.61196	13/109	49,56,8153,11131,27120,54760,64518,84519,93661,122258,136242,161514,171169	ACR,ACRV1,RND2,CAPN11,DKKL1,PCSK4,TEKT3,ACRBP,CAPZA3,SPACA7,PRSS37,TBC1D21,SPACA4
1_Member	GO Cellular Components	GO:0002080	acrosomal membrane	-4.29856	-1.36735	4/24	8153,54760,64518,84519	RND2,PCSK4,TEKT3,ACRBP
2_Summary	GO Biological Processes	GO:0007283	spermatogenesis	-22.7323	-18.6707	38/547	480,881,4956,5620,5990,7141,11063,11086,26038,26256,29999,51298,51686,54760,57828,64847,81616,81629,83983,84073,84203,84225,84519,84688,85438,93661,113746,117144,122664,140732,146310,161514,168391,199720,219793,219938,284680,317719,5347,57151,101927581	ATP1A4,CCIN,ODF1,PRM2,RFX2,TNP1,SOX30,ADAM29,CHD5,CABYR,FSCN3,THEG,OAZ3,PCSK4,CATSPERG,SPATA20,ACSBG2,TSSK3,TSSK6,MYCBPAP,TXNDC2,ZMYND15,ACRBP,C9orf24,CABS1,CAPZA3,ODF3,CATSPER1,TPPP2,SUN5,RNF151,TBC1D21,GALNTL5,GGN,TBATA,SPATA19,SPATA46,KLHL10,PLK1,LYZL6,CCDC182
2_Member	GO Biological Processes	GO:0007283	spermatogenesis	-22.7323	-18.6707	38/547	480,881,4956,5620,5990,7141,11063,11086,26038,26256,29999,51298,51686,54760,57828,64847,81616,81629,83983,84073,84203,84225,84519,84688,85438,93661,113746,117144,122664,140732,146310,161514,168391,199720,219793,219938,284680,317719	ATP1A4,CCIN,ODF1,PRM2,RFX2,TNP1,SOX30,ADAM29,CHD5,CABYR,FSCN3,THEG,OAZ3,PCSK4,CATSPERG,SPATA20,ACSBG2,TSSK3,TSSK6,MYCBPAP,TXNDC2,ZMYND15,ACRBP,C9orf24,CABS1,CAPZA3,ODF3,CATSPER1,TPPP2,SUN5,RNF151,TBC1D21,GALNTL5,GGN,TBATA,SPATA19,SPATA46,KLHL10
2_Member	GO Biological Processes	GO:0048232	male gamete generation	-22.1804	-18.2949	38/567	480,881,4956,5620,5990,7141,11063,11086,26038,26256,29999,51298,51686,54760,57828,64847,81616,81629,83983,84073,84203,84225,84519,84688,85438,93661,113746,117144,122664,140732,146310,161514,168391,199720,219793,219938,284680,317719	ATP1A4,CCIN,ODF1,PRM2,RFX2,TNP1,SOX30,ADAM29,CHD5,CABYR,FSCN3,THEG,OAZ3,PCSK4,CATSPERG,SPATA20,ACSBG2,TSSK3,TSSK6,MYCBPAP,TXNDC2,ZMYND15,ACRBP,C9orf24,CABS1,CAPZA3,ODF3,CATSPER1,TPPP2,SUN5,RNF151,TBC1D21,GALNTL5,GGN,TBATA,SPATA19,SPATA46,KLHL10
2_Member	GO Biological Processes	GO:0007276	gamete generation	-19.868	-16.1075	39/702	480,881,4956,5347,5620,5990,7141,11063,11086,26038,26256,29999,51298,51686,54760,57828,64847,81616,81629,83983,84073,84203,84225,84519,84688,85438,93661,113746,117144,122664,140732,146310,161514,168391,199720,219793,219938,284680,317719	ATP1A4,CCIN,ODF1,PLK1,PRM2,RFX2,TNP1,SOX30,ADAM29,CHD5,CABYR,FSCN3,THEG,OAZ3,PCSK4,CATSPERG,SPATA20,ACSBG2,TSSK3,TSSK6,MYCBPAP,TXNDC2,ZMYND15,ACRBP,C9orf24,CABS1,CAPZA3,ODF3,CATSPER1,TPPP2,SUN5,RNF151,TBC1D21,GALNTL5,GGN,TBATA,SPATA19,SPATA46,KLHL10
2_Member	GO Biological Processes	GO:0007286	spermatid development	-11.1957	-7.78736	15/155	5620,5990,7141,11063,26038,26256,29999,54760,83983,84225,84519,93661,140732,168391,317719	PRM2,RFX2,TNP1,SOX30,CHD5,CABYR,FSCN3,PCSK4,TSSK6,ZMYND15,ACRBP,CAPZA3,SUN5,GALNTL5,KLHL10
2_Member	GO Biological Processes	GO:0048515	spermatid differentiation	-10.9563	-7.61196	15/161	5620,5990,7141,11063,26038,26256,29999,54760,83983,84225,84519,93661,140732,168391,317719	PRM2,RFX2,TNP1,SOX30,CHD5,CABYR,FSCN3,PCSK4,TSSK6,ZMYND15,ACRBP,CAPZA3,SUN5,GALNTL5,KLHL10
2_Member	GO Biological Processes	GO:0022412	cellular process involved in reproduction in multicellular organism	-8.77597	-5.61751	18/349	5347,5620,5990,7141,11063,26038,26256,29999,54760,57151,83983,84225,84519,93661,140732,168391,284680,317719	PLK1,PRM2,RFX2,TNP1,SOX30,CHD5,CABYR,FSCN3,PCSK4,LYZL6,TSSK6,ZMYND15,ACRBP,CAPZA3,SUN5,GALNTL5,SPATA46,KLHL10
2_Member	GO Biological Processes	GO:0007281	germ cell development	-8.06857	-4.93645	15/259	5620,5990,7141,11063,26038,26256,29999,54760,83983,84225,84519,93661,140732,168391,317719	PRM2,RFX2,TNP1,SOX30,CHD5,CABYR,FSCN3,PCSK4,TSSK6,ZMYND15,ACRBP,CAPZA3,SUN5,GALNTL5,KLHL10
2_Member	GO Biological Processes	GO:0003006	developmental process involved in reproduction	-3.50394	-0.721146	16/683	5620,5990,7141,11063,26038,26256,29999,54760,83983,84225,84519,93661,140732,168391,317719,101927581	PRM2,RFX2,TNP1,SOX30,CHD5,CABYR,FSCN3,PCSK4,TSSK6,ZMYND15,ACRBP,CAPZA3,SUN5,GALNTL5,KLHL10,CCDC182
3_Summary	GO Cellular Components	GO:0031514	motile cilium	-18.0461	-14.3824	22/187	480,4956,5232,8632,8852,10881,26256,27285,57151,57828,64446,64518,84075,84229,85438,113746,117144,122664,140732,146279,158297,202500,4184,7141,26330,2978,7288,81492,389799	ATP1A4,ODF1,PGK2,DNAH17,AKAP4,ACTL7A,CABYR,TEKT2,LYZL6,CATSPERG,DNAI2,TEKT3,FSCB,DRC7,CABS1,ODF3,CATSPER1,TPPP2,SUN5,TEKT5,SAXO1,TCTE1,SMCP,TNP1,GAPDHS,GUCA1A,TULP2,RSPH6A,CFAP77
3_Member	GO Cellular Components	GO:0031514	motile cilium	-18.0461	-14.3824	22/187	480,4956,5232,8632,8852,10881,26256,27285,57151,57828,64446,64518,84075,84229,85438,113746,117144,122664,140732,146279,158297,202500	ATP1A4,ODF1,PGK2,DNAH17,AKAP4,ACTL7A,CABYR,TEKT2,LYZL6,CATSPERG,DNAI2,TEKT3,FSCB,DRC7,CABS1,ODF3,CATSPER1,TPPP2,SUN5,TEKT5,SAXO1,TCTE1
3_Member	GO Cellular Components	GO:0036126	sperm flagellum	-13.9794	-10.395	15/101	480,4956,5232,8852,26256,57151,57828,64446,64518,113746,122664,140732,146279,158297,202500	ATP1A4,ODF1,PGK2,AKAP4,CABYR,LYZL6,CATSPERG,DNAI2,TEKT3,ODF3,TPPP2,SUN5,TEKT5,SAXO1,TCTE1
3_Member	GO Cellular Components	GO:0097729	9+2 motile cilium	-13.6575	-10.1401	15/106	480,4956,5232,8852,26256,57151,57828,64446,64518,113746,122664,140732,146279,158297,202500	ATP1A4,ODF1,PGK2,AKAP4,CABYR,LYZL6,CATSPERG,DNAI2,TEKT3,ODF3,TPPP2,SUN5,TEKT5,SAXO1,TCTE1
3_Member	GO Biological Processes	GO:0030317	flagellated sperm motility	-10.6583	-7.40962	12/91	480,4184,5232,7141,8852,26330,27285,64518,84229,117144,122664,202500	ATP1A4,SMCP,PGK2,TNP1,AKAP4,GAPDHS,TEKT2,TEKT3,DRC7,CATSPER1,TPPP2,TCTE1
3_Member	GO Biological Processes	GO:0097722	sperm motility	-10.6583	-7.40962	12/91	480,4184,5232,7141,8852,26330,27285,64518,84229,117144,122664,202500	ATP1A4,SMCP,PGK2,TNP1,AKAP4,GAPDHS,TEKT2,TEKT3,DRC7,CATSPER1,TPPP2,TCTE1
3_Member	GO Cellular Components	GO:0005929	cilium	-10.2699	-7.05344	26/634	480,2978,4956,5232,7288,8632,8852,10881,26256,27285,57151,57828,64446,64518,81492,84075,84229,85438,113746,117144,122664,140732,146279,158297,202500,389799	ATP1A4,GUCA1A,ODF1,PGK2,TULP2,DNAH17,AKAP4,ACTL7A,CABYR,TEKT2,LYZL6,CATSPERG,DNAI2,TEKT3,RSPH6A,FSCB,DRC7,CABS1,ODF3,CATSPER1,TPPP2,SUN5,TEKT5,SAXO1,TCTE1,CFAP77
3_Member	GO Cellular Components	GO:0044441	ciliary part	-4.21059	-1.29517	14/468	480,2978,4956,5232,8632,8852,26256,57151,57828,64446,81492,113746,140732,158297	ATP1A4,GUCA1A,ODF1,PGK2,DNAH17,AKAP4,CABYR,LYZL6,CATSPERG,DNAI2,RSPH6A,ODF3,SUN5,SAXO1
4_Summary	GO Biological Processes	GO:0009566	fertilization	-11.2284	-7.78736	16/183	49,480,3305,4184,7141,8852,27120,54760,57151,57828,84519,117144,122258,136242,284680,317719,3991,136541,221191	ACR,ATP1A4,HSPA1L,SMCP,TNP1,AKAP4,DKKL1,PCSK4,LYZL6,CATSPERG,ACRBP,CATSPER1,SPACA7,PRSS37,SPATA46,KLHL10,LIPE,PRSS58,PRSS54
4_Member	GO Biological Processes	GO:0009566	fertilization	-11.2284	-7.78736	16/183	49,480,3305,4184,7141,8852,27120,54760,57151,57828,84519,117144,122258,136242,284680,317719	ACR,ATP1A4,HSPA1L,SMCP,TNP1,AKAP4,DKKL1,PCSK4,LYZL6,CATSPERG,ACRBP,CATSPER1,SPACA7,PRSS37,SPATA46,KLHL10
4_Member	GO Biological Processes	GO:0007338	single fertilization	-9.21019	-6.0237	13/149	49,3305,4184,7141,8852,27120,54760,57151,57828,117144,122258,136242,284680	ACR,HSPA1L,SMCP,TNP1,AKAP4,DKKL1,PCSK4,LYZL6,CATSPERG,CATSPER1,SPACA7,PRSS37,SPATA46
4_Member	GO Biological Processes	GO:0035036	sperm-egg recognition	-5.29665	-2.2765	6/51	49,3305,54760,57828,117144,136242	ACR,HSPA1L,PCSK4,CATSPERG,CATSPER1,PRSS37
4_Member	GO Biological Processes	GO:0009988	cell-cell recognition	-4.42381	-1.4762	6/72	49,3305,54760,57828,117144,136242	ACR,HSPA1L,PCSK4,CATSPERG,CATSPER1,PRSS37
4_Member	GO Biological Processes	GO:0007339	binding of sperm to zona pellucida	-3.54326	-0.748884	4/37	49,3305,54760,136242	ACR,HSPA1L,PCSK4,PRSS37
4_Member	GO Biological Processes	GO:0007340	acrosome reaction	-2.30387	0	3/40	49,54760,136242	ACR,PCSK4,PRSS37
4_Member	GO Molecular Functions	GO:0017171	serine hydrolase activity	-2.20116	0	6/190	49,3991,54760,136242,136541,221191	ACR,LIPE,PCSK4,PRSS37,PRSS58,PRSS54
5_Summary	GO Biological Processes	GO:0003341	cilium movement	-7.86556	-4.75825	9/73	8632,26256,27285,51364,64446,64518,81492,117144,146279,5347,122664,352909,5990,8852,158297,161514,84643,79998,284403	DNAH17,CABYR,TEKT2,ZMYND10,DNAI2,TEKT3,RSPH6A,CATSPER1,TEKT5,PLK1,TPPP2,DNAAF3,RFX2,AKAP4,SAXO1,TBC1D21,KIF2B,ANKRD53,WDR62
5_Member	GO Biological Processes	GO:0003341	cilium movement	-7.86556	-4.75825	9/73	8632,26256,27285,51364,64446,64518,81492,117144,146279	DNAH17,CABYR,TEKT2,ZMYND10,DNAI2,TEKT3,RSPH6A,CATSPER1,TEKT5
5_Member	GO Biological Processes	GO:0001539	cilium or flagellum-dependent cell motility	-6.37036	-3.30881	6/34	8632,27285,64518,81492,117144,146279	DNAH17,TEKT2,TEKT3,RSPH6A,CATSPER1,TEKT5
5_Member	GO Biological Processes	GO:0060285	cilium-dependent cell motility	-6.37036	-3.30881	6/34	8632,27285,64518,81492,117144,146279	DNAH17,TEKT2,TEKT3,RSPH6A,CATSPER1,TEKT5
5_Member	GO Biological Processes	GO:0060294	cilium movement involved in cell motility	-5.96912	-2.92876	5/22	27285,64518,81492,117144,146279	TEKT2,TEKT3,RSPH6A,CATSPER1,TEKT5
5_Member	GO Biological Processes	GO:0001578	microtubule bundle formation	-4.72326	-1.72241	7/95	5347,27285,51364,64446,81492,122664,352909	PLK1,TEKT2,ZMYND10,DNAI2,RSPH6A,TPPP2,DNAAF3
5_Member	GO Biological Processes	GO:0070286	axonemal dynein complex assembly	-3.90473	-1.01928	4/30	27285,51364,64446,352909	TEKT2,ZMYND10,DNAI2,DNAAF3
5_Member	GO Biological Processes	GO:0060271	cilium assembly	-3.78664	-0.929211	12/391	5347,5990,8852,27285,51364,64446,64518,81492,146279,158297,161514,352909	PLK1,RFX2,AKAP4,TEKT2,ZMYND10,DNAI2,TEKT3,RSPH6A,TEKT5,SAXO1,TBC1D21,DNAAF3
5_Member	GO Biological Processes	GO:0035082	axoneme assembly	-3.66759	-0.846414	5/63	27285,51364,64446,81492,352909	TEKT2,ZMYND10,DNAI2,RSPH6A,DNAAF3
5_Member	GO Biological Processes	GO:0007018	microtubule-based movement	-3.66492	-0.846414	10/288	8632,26256,27285,51364,64446,64518,81492,84643,117144,146279	DNAH17,CABYR,TEKT2,ZMYND10,DNAI2,TEKT3,RSPH6A,KIF2B,CATSPER1,TEKT5
5_Member	GO Biological Processes	GO:0044782	cilium organization	-3.60743	-0.801154	12/409	5347,5990,8852,27285,51364,64446,64518,81492,146279,158297,161514,352909	PLK1,RFX2,AKAP4,TEKT2,ZMYND10,DNAI2,TEKT3,RSPH6A,TEKT5,SAXO1,TBC1D21,DNAAF3
5_Member	GO Cellular Components	GO:0044447	axoneme part	-3.41099	-0.639477	4/40	8632,64446,81492,158297	DNAH17,DNAI2,RSPH6A,SAXO1
5_Member	GO Biological Processes	GO:0007017	microtubule-based process	-2.86708	-0.157717	16/784	5347,8632,26256,27285,51364,64446,64518,79998,81492,84643,117144,122664,146279,158297,284403,352909	PLK1,DNAH17,CABYR,TEKT2,ZMYND10,DNAI2,TEKT3,ANKRD53,RSPH6A,KIF2B,CATSPER1,TPPP2,TEKT5,SAXO1,WDR62,DNAAF3
5_Member	GO Biological Processes	GO:0120031	plasma membrane bounded cell projection assembly	-2.26346	0	12/590	5347,5990,8852,27285,51364,64446,64518,81492,146279,158297,161514,352909	PLK1,RFX2,AKAP4,TEKT2,ZMYND10,DNAI2,TEKT3,RSPH6A,TEKT5,SAXO1,TBC1D21,DNAAF3
5_Member	GO Biological Processes	GO:0030031	cell projection assembly	-2.19082	0	12/603	5347,5990,8852,27285,51364,64446,64518,81492,146279,158297,161514,352909	PLK1,RFX2,AKAP4,TEKT2,ZMYND10,DNAI2,TEKT3,RSPH6A,TEKT5,SAXO1,TBC1D21,DNAAF3
6_Summary	GO Biological Processes	GO:0007341	penetration of zona pellucida	-4.4621	-1.49746	3/8	49,4184,27120	ACR,SMCP,DKKL1
6_Member	GO Biological Processes	GO:0007341	penetration of zona pellucida	-4.4621	-1.49746	3/8	49,4184,27120	ACR,SMCP,DKKL1
7_Summary	GO Cellular Components	GO:0035686	sperm fibrous sheath	-4.4621	-1.49746	3/8	5232,8852,26256,51364,352909,57828	PGK2,AKAP4,CABYR,ZMYND10,DNAAF3,CATSPERG
7_Member	GO Cellular Components	GO:0035686	sperm fibrous sheath	-4.4621	-1.49746	3/8	5232,8852,26256	PGK2,AKAP4,CABYR
7_Member	GO Biological Processes	GO:0044458	motile cilium assembly	-3.06156	-0.301042	3/22	8852,51364,352909	AKAP4,ZMYND10,DNAAF3
7_Member	GO Cellular Components	GO:0097228	sperm principal piece	-3.00362	-0.274515	3/23	8852,26256,57828	AKAP4,CABYR,CATSPERG
8_Summary	GO Molecular Functions	GO:0003796	lysozyme activity	-4.13666	-1.23648	3/10	57151,84569,119180	LYZL6,LYZL1,LYZL2
8_Member	GO Molecular Functions	GO:0003796	lysozyme activity	-4.13666	-1.23648	3/10	57151,84569,119180	LYZL6,LYZL1,LYZL2
8_Member	GO Molecular Functions	GO:0061783	peptidoglycan muralytic activity	-3.66584	-0.846414	3/14	57151,84569,119180	LYZL6,LYZL1,LYZL2
9_Summary	GO Biological Processes	GO:0035092	sperm chromatin condensation	-3.87897	-1.00775	3/12	7141,26038,83983,5347,5620,140732	TNP1,CHD5,TSSK6,PLK1,PRM2,SUN5
9_Member	GO Biological Processes	GO:0035092	sperm chromatin condensation	-3.87897	-1.00775	3/12	7141,26038,83983	TNP1,CHD5,TSSK6
9_Member	GO Biological Processes	GO:0007289	spermatid nucleus differentiation	-3.00362	-0.274515	3/23	7141,26038,83983	TNP1,CHD5,TSSK6
9_Member	GO Biological Processes	GO:0006997	nucleus organization	-2.93706	-0.217936	6/135	5347,5620,7141,26038,83983,140732	PLK1,PRM2,TNP1,CHD5,TSSK6,SUN5
10_Summary	KEGG Pathway	hsa04964	Proximal tubule bicarbonate reclamation	-3.00362	-0.274515	3/23	478,480,760	ATP1A3,ATP1A4,CA2
10_Member	KEGG Pathway	hsa04964	Proximal tubule bicarbonate reclamation	-3.00362	-0.274515	3/23	478,480,760	ATP1A3,ATP1A4,CA2
