# Supplementary material for: Infertility network and hub genes for nonobstructive azoospermia utilizing integrative analysis
Source: Aging (Albany NY). 2021 Feb 17;13(5):7052–66. doi: 10.18632/aging.202559 (PMC7993690; doi:10.18632/aging.202559)
Supplement: Supplementary Table 3 [file aging-13-202559-s004.xlsx]

## Sheet: KEGG analysis
Supplementary Table 3. The KEGG enrichment analysis summary table based on all DEGs.
##Databases: KEGG PATHWAY
##Statistical test method: hypergeometric test / Fisher's exact test
##FDR correction method: Benjamini and Hochberg
#Term	Database	ID	Input number	Background number	P-Value	Corrected P-Value	Input	Hyperlink
Proximal tubule bicarbonate reclamation	KEGG PATHWAY	hsa04964	3	23	0.000124976	0.0101231	CA2|ATP1A4|ATP1A3	http://www.genome.jp/kegg-bin/show_pathway?hsa04964/hsa:760%09red/hsa:478%09red/hsa:480%09red
Aldosterone synthesis and secretion	KEGG PATHWAY	hsa04925	4	98	0.000601512	0.0243612	NR4A2|ATP1A3|ATP1A4|LIPE	http://www.genome.jp/kegg-bin/show_pathway?hsa04925/hsa:3991%09red/hsa:4929%09red/hsa:478%09red/hsa:480%09red
Glycolysis / Gluconeogenesis	KEGG PATHWAY	hsa00010	3	68	0.0024285	0.0513751	PGK2|GAPDHS|PFKP	http://www.genome.jp/kegg-bin/show_pathway?hsa00010/hsa:5214%09red/hsa:5232%09red/hsa:26330%09red
Bile secretion	KEGG PATHWAY	hsa04976	3	72	0.00283797	0.0513751	CA2|ATP1A4|ATP1A3	http://www.genome.jp/kegg-bin/show_pathway?hsa04976/hsa:760%09red/hsa:478%09red/hsa:480%09red
Gastric acid secretion	KEGG PATHWAY	hsa04971	3	75	0.0031713	0.0513751	CA2|ATP1A4|ATP1A3	http://www.genome.jp/kegg-bin/show_pathway?hsa04971/hsa:760%09red/hsa:478%09red/hsa:480%09red
Salivary secretion	KEGG PATHWAY	hsa04970	3	90	0.00519294	0.0701046	ATP1A4|AQP5|ATP1A3	http://www.genome.jp/kegg-bin/show_pathway?hsa04970/hsa:478%09red/hsa:480%09red/hsa:362%09red
Pancreatic secretion	KEGG PATHWAY	hsa04972	3	98	0.00652555	0.07551	CA2|ATP1A4|ATP1A3	http://www.genome.jp/kegg-bin/show_pathway?hsa04972/hsa:760%09red/hsa:478%09red/hsa:480%09red
HIF-1 signaling pathway	KEGG PATHWAY	hsa04066	3	109	0.00866238	0.0843898	EIF4E|PGK2|PFKP	http://www.genome.jp/kegg-bin/show_pathway?hsa04066/hsa:5214%09red/hsa:5232%09red/hsa:1977%09red
Aldosterone-regulated sodium reabsorption	KEGG PATHWAY	hsa04960	2	37	0.00937664	0.0843898	ATP1A4|ATP1A3	http://www.genome.jp/kegg-bin/show_pathway?hsa04960/hsa:478%09red/hsa:480%09red
Thyroid hormone signaling pathway	KEGG PATHWAY	hsa04919	3	119	0.0109213	0.0884625	ATP1A4|ATP1A3|PFKP	http://www.genome.jp/kegg-bin/show_pathway?hsa04919/hsa:5214%09red/hsa:478%09red/hsa:480%09red
Carbohydrate digestion and absorption	KEGG PATHWAY	hsa04973	2	44	0.0128754	0.0948094	ATP1A4|ATP1A3	http://www.genome.jp/kegg-bin/show_pathway?hsa04973/hsa:478%09red/hsa:480%09red
Insulin signaling pathway	KEGG PATHWAY	hsa04910	3	137	0.0157712	0.10129	EIF4E|LIPE|PHKG2	http://www.genome.jp/kegg-bin/show_pathway?hsa04910/hsa:3991%09red/hsa:5261%09red/hsa:1977%09red
Endocrine and other factor-regulated calcium reabsorption	KEGG PATHWAY	hsa04961	2	50	0.0162564	0.10129	ATP1A4|ATP1A3	http://www.genome.jp/kegg-bin/show_pathway?hsa04961/hsa:478%09red/hsa:480%09red
Mineral absorption	KEGG PATHWAY	hsa04978	2	53	0.0180735	0.104568	ATP1A4|ATP1A3	http://www.genome.jp/kegg-bin/show_pathway?hsa04978/hsa:478%09red/hsa:480%09red
Longevity regulating pathway - multiple species	KEGG PATHWAY	hsa04213	2	62	0.0240064	0.129635	CLPB|HSPA1L	http://www.genome.jp/kegg-bin/show_pathway?hsa04213/hsa:81570%09red/hsa:3305%09red
Phosphonate and phosphinate metabolism	KEGG PATHWAY	hsa00440	1	6	0.0258297	0.130763	PCYT2	http://www.genome.jp/kegg-bin/show_pathway?hsa00440/hsa:5833%09red
Thyroid hormone synthesis	KEGG PATHWAY	hsa04918	2	74	0.0329675	0.151943	ATP1A4|ATP1A3	http://www.genome.jp/kegg-bin/show_pathway?hsa04918/hsa:478%09red/hsa:480%09red
Biosynthesis of amino acids	KEGG PATHWAY	hsa01230	2	75	0.0337651	0.151943	PGK2|PFKP	http://www.genome.jp/kegg-bin/show_pathway?hsa01230/hsa:5214%09red/hsa:5232%09red
Cardiac muscle contraction	KEGG PATHWAY	hsa04260	2	86	0.0430195	0.174229	ATP1A4|ATP1A3	http://www.genome.jp/kegg-bin/show_pathway?hsa04260/hsa:478%09red/hsa:480%09red
Insulin secretion	KEGG PATHWAY	hsa04911	2	86	0.0430195	0.174229	ATP1A4|ATP1A3	http://www.genome.jp/kegg-bin/show_pathway?hsa04911/hsa:478%09red/hsa:480%09red
Protein digestion and absorption	KEGG PATHWAY	hsa04974	2	90	0.046593	0.177342	ATP1A4|ATP1A3	http://www.genome.jp/kegg-bin/show_pathway?hsa04974/hsa:478%09red/hsa:480%09red
cAMP signaling pathway	KEGG PATHWAY	hsa04024	3	214	0.0481669	0.177342	ATP1A3|ATP1A4|LIPE	http://www.genome.jp/kegg-bin/show_pathway?hsa04024/hsa:3991%09red/hsa:478%09red/hsa:480%09red
Glycerophospholipid metabolism	KEGG PATHWAY	hsa00564	2	97	0.0530963	0.186991	PCYT2|PHOSPHO1	http://www.genome.jp/kegg-bin/show_pathway?hsa00564/hsa:5833%09red/hsa:162466%09red
Glucagon signaling pathway	KEGG PATHWAY	hsa04922	2	106	0.0618962	0.2089	PHKG2|PFKP	http://www.genome.jp/kegg-bin/show_pathway?hsa04922/hsa:5214%09red/hsa:5261%09red
Nitrogen metabolism	KEGG PATHWAY	hsa00910	1	17	0.0650841	0.210873	CA2	http://www.genome.jp/kegg-bin/show_pathway?hsa00910/hsa:760%09red
Fatty acid biosynthesis	KEGG PATHWAY	hsa00061	1	18	0.0685737	0.213633	ACSBG2	http://www.genome.jp/kegg-bin/show_pathway?hsa00061/hsa:81616%09red
Carbon metabolism	KEGG PATHWAY	hsa01200	2	117	0.0732654	0.219796	PGK2|PFKP	http://www.genome.jp/kegg-bin/show_pathway?hsa01200/hsa:5214%09red/hsa:5232%09red
AMPK signaling pathway	KEGG PATHWAY	hsa04152	2	120	0.0764745	0.22123	LIPE|PFKP	http://www.genome.jp/kegg-bin/show_pathway?hsa04152/hsa:3991%09red/hsa:5214%09red
Metabolic pathways	KEGG PATHWAY	hsa01100	9	1433	0.0926667	0.253745	GALNTL5|ALLC|PHOSPHO1|CA2|PCYT2|GAPDHS|PFKP|ACSBG2|PGK2	http://www.genome.jp/kegg-bin/show_pathway?hsa01100/hsa:760%09red/hsa:5833%09red/hsa:168391%09red/hsa:81616%09red/hsa:162466%09red/hsa:55821%09red/hsa:5232%09red/hsa:5214%09red/hsa:26330%09red
Collecting duct acid secretion	KEGG PATHWAY	hsa04966	1	27	0.0994019	0.253745	CA2	http://www.genome.jp/kegg-bin/show_pathway?hsa04966/hsa:760%09red
Phototransduction	KEGG PATHWAY	hsa04744	1	28	0.102764	0.253745	GUCA1A	http://www.genome.jp/kegg-bin/show_pathway?hsa04744/hsa:2978%09red
Pentose phosphate pathway	KEGG PATHWAY	hsa00030	1	30	0.109451	0.253745	PFKP	http://www.genome.jp/kegg-bin/show_pathway?hsa00030/hsa:5214%09red
Adrenergic signaling in cardiomyocytes	KEGG PATHWAY	hsa04261	2	149	0.109558	0.253745	ATP1A4|ATP1A3	http://www.genome.jp/kegg-bin/show_pathway?hsa04261/hsa:478%09red/hsa:480%09red
Galactose metabolism	KEGG PATHWAY	hsa00052	1	31	0.112775	0.253745	PFKP	http://www.genome.jp/kegg-bin/show_pathway?hsa00052/hsa:5214%09red
Mucin type O-glycan biosynthesis	KEGG PATHWAY	hsa00512	1	31	0.112775	0.253745	GALNTL5	http://www.genome.jp/kegg-bin/show_pathway?hsa00512/hsa:168391%09red
Asthma	KEGG PATHWAY	hsa05310	1	31	0.112775	0.253745	IL13	http://www.genome.jp/kegg-bin/show_pathway?hsa05310/hsa:3596%09red
Fructose and mannose metabolism	KEGG PATHWAY	hsa00051	1	33	0.119388	0.260092	PFKP	http://www.genome.jp/kegg-bin/show_pathway?hsa00051/hsa:5214%09red
Cellular senescence	KEGG PATHWAY	hsa04218	2	160	0.12294	0.260092	FOXM1|HIPK4	http://www.genome.jp/kegg-bin/show_pathway?hsa04218/hsa:2305%09red/hsa:147746%09red
Protein processing in endoplasmic reticulum	KEGG PATHWAY	hsa04141	2	165	0.129148	0.260092	UBQLN3|HSPA1L	http://www.genome.jp/kegg-bin/show_pathway?hsa04141/hsa:50613%09red/hsa:3305%09red
RNA transport	KEGG PATHWAY	hsa03013	2	165	0.129148	0.260092	EIF4E|POM121L2	http://www.genome.jp/kegg-bin/show_pathway?hsa03013/hsa:94026%09red/hsa:1977%09red
cGMP-PKG signaling pathway	KEGG PATHWAY	hsa04022	2	167	0.131651	0.260092	ATP1A4|ATP1A3	http://www.genome.jp/kegg-bin/show_pathway?hsa04022/hsa:478%09red/hsa:480%09red
Ferroptosis	KEGG PATHWAY	hsa04216	1	40	0.142147	0.274141	FTMT	http://www.genome.jp/kegg-bin/show_pathway?hsa04216/hsa:94033%09red
Fatty acid degradation	KEGG PATHWAY	hsa00071	1	44	0.154889	0.291767	ACSBG2	http://www.genome.jp/kegg-bin/show_pathway?hsa00071/hsa:81616%09red
Huntington disease	KEGG PATHWAY	hsa05016	2	193	0.165105	0.303943	DNAH17|DNAI2	http://www.genome.jp/kegg-bin/show_pathway?hsa05016/hsa:64446%09red/hsa:8632%09red
Amyotrophic lateral sclerosis (ALS)	KEGG PATHWAY	hsa05014	1	51	0.176735	0.318123	PRPH	http://www.genome.jp/kegg-bin/show_pathway?hsa05014/hsa:5630%09red
Legionellosis	KEGG PATHWAY	hsa05134	1	55	0.188965	0.325664	HSPA1L	http://www.genome.jp/kegg-bin/show_pathway?hsa05134/hsa:3305%09red
Regulation of lipolysis in adipocytes	KEGG PATHWAY	hsa04923	1	55	0.188965	0.325664	LIPE	http://www.genome.jp/kegg-bin/show_pathway?hsa04923/hsa:3991%09red
Fatty acid metabolism	KEGG PATHWAY	hsa01212	1	57	0.195012	0.329083	ACSBG2	http://www.genome.jp/kegg-bin/show_pathway?hsa01212/hsa:81616%09red
Inflammatory bowel disease (IBD)	KEGG PATHWAY	hsa05321	1	65	0.218755	0.357539	IL13	http://www.genome.jp/kegg-bin/show_pathway?hsa05321/hsa:3596%09red
Fc epsilon RI signaling pathway	KEGG PATHWAY	hsa04664	1	68	0.227478	0.357539	IL13	http://www.genome.jp/kegg-bin/show_pathway?hsa04664/hsa:3596%09red
Central carbon metabolism in cancer	KEGG PATHWAY	hsa05230	1	69	0.230364	0.357539	PFKP	http://www.genome.jp/kegg-bin/show_pathway?hsa05230/hsa:5214%09red
Adipocytokine signaling pathway	KEGG PATHWAY	hsa04920	1	69	0.230364	0.357539	ACSBG2	http://www.genome.jp/kegg-bin/show_pathway?hsa04920/hsa:81616%09red
Endocytosis	KEGG PATHWAY	hsa04144	2	244	0.233945	0.357539	CAPZA3|HSPA1L	http://www.genome.jp/kegg-bin/show_pathway?hsa04144/hsa:3305%09red/hsa:93661%09red
PPAR signaling pathway	KEGG PATHWAY	hsa03320	1	76	0.250268	0.367542	ACSBG2	http://www.genome.jp/kegg-bin/show_pathway?hsa03320/hsa:81616%09red
Antigen processing and presentation	KEGG PATHWAY	hsa04612	1	77	0.253069	0.367542	HSPA1L	http://www.genome.jp/kegg-bin/show_pathway?hsa04612/hsa:3305%09red
RNA degradation	KEGG PATHWAY	hsa03018	1	79	0.258641	0.367542	PFKP	http://www.genome.jp/kegg-bin/show_pathway?hsa03018/hsa:5214%09red
EGFR tyrosine kinase inhibitor resistance	KEGG PATHWAY	hsa01521	1	79	0.258641	0.367542	EIF4E	http://www.genome.jp/kegg-bin/show_pathway?hsa01521/hsa:1977%09red
Longevity regulating pathway	KEGG PATHWAY	hsa04211	1	89	0.285883	0.39925	EIF4E	http://www.genome.jp/kegg-bin/show_pathway?hsa04211/hsa:1977%09red
Th1 and Th2 cell differentiation	KEGG PATHWAY	hsa04658	1	92	0.29386	0.400274	IL13	http://www.genome.jp/kegg-bin/show_pathway?hsa04658/hsa:3596%09red
IL-17 signaling pathway	KEGG PATHWAY	hsa04657	1	93	0.296499	0.400274	IL13	http://www.genome.jp/kegg-bin/show_pathway?hsa04657/hsa:3596%09red
MicroRNAs in cancer	KEGG PATHWAY	hsa05206	2	299	0.309625	0.407781	MIR99A|MIR15A	http://www.genome.jp/kegg-bin/show_pathway?hsa05206/hsa:406948%09red/hsa:407055%09red
Progesterone-mediated oocyte maturation	KEGG PATHWAY	hsa04914	1	99	0.312129	0.407781	PLK1	http://www.genome.jp/kegg-bin/show_pathway?hsa04914/hsa:5347%09red
Parathyroid hormone synthesis, secretion and action	KEGG PATHWAY	hsa04928	1	106	0.329928	0.424193	NR4A2	http://www.genome.jp/kegg-bin/show_pathway?hsa04928/hsa:4929%09red
Toxoplasmosis	KEGG PATHWAY	hsa05145	1	113	0.347268	0.439511	HSPA1L	http://www.genome.jp/kegg-bin/show_pathway?hsa05145/hsa:3305%09red
Lysosome	KEGG PATHWAY	hsa04142	1	123	0.371268	0.450083	LAMP3	http://www.genome.jp/kegg-bin/show_pathway?hsa04142/hsa:27074%09red
Cell cycle	KEGG PATHWAY	hsa04110	1	124	0.373619	0.450083	PLK1	http://www.genome.jp/kegg-bin/show_pathway?hsa04110/hsa:5347%09red
Oocyte meiosis	KEGG PATHWAY	hsa04114	1	128	0.382936	0.450083	PLK1	http://www.genome.jp/kegg-bin/show_pathway?hsa04114/hsa:5347%09red
Purine metabolism	KEGG PATHWAY	hsa00230	1	130	0.387543	0.450083	ALLC	http://www.genome.jp/kegg-bin/show_pathway?hsa00230/hsa:55821%09red
FoxO signaling pathway	KEGG PATHWAY	hsa04068	1	132	0.392115	0.450083	PLK1	http://www.genome.jp/kegg-bin/show_pathway?hsa04068/hsa:5347%09red
Spliceosome	KEGG PATHWAY	hsa03040	1	135	0.398911	0.450083	HSPA1L	http://www.genome.jp/kegg-bin/show_pathway?hsa03040/hsa:3305%09red
Apelin signaling pathway	KEGG PATHWAY	hsa04371	1	137	0.403399	0.450083	LIPE	http://www.genome.jp/kegg-bin/show_pathway?hsa04371/hsa:3991%09red
Measles	KEGG PATHWAY	hsa05162	1	138	0.40563	0.450083	HSPA1L	http://www.genome.jp/kegg-bin/show_pathway?hsa05162/hsa:3305%09red
Estrogen signaling pathway	KEGG PATHWAY	hsa04915	1	138	0.40563	0.450083	HSPA1L	http://www.genome.jp/kegg-bin/show_pathway?hsa04915/hsa:3305%09red
mTOR signaling pathway	KEGG PATHWAY	hsa04150	1	153	0.438123	0.479568	EIF4E	http://www.genome.jp/kegg-bin/show_pathway?hsa04150/hsa:1977%09red
Jak-STAT signaling pathway	KEGG PATHWAY	hsa04630	1	162	0.456764	0.493305	IL13	http://www.genome.jp/kegg-bin/show_pathway?hsa04630/hsa:3596%09red
Calcium signaling pathway	KEGG PATHWAY	hsa04020	1	193	0.516384	0.550357	PHKG2	http://www.genome.jp/kegg-bin/show_pathway?hsa04020/hsa:5261%09red
Thermogenesis	KEGG PATHWAY	hsa04714	1	231	0.580652	0.610816	LIPE	http://www.genome.jp/kegg-bin/show_pathway?hsa04714/hsa:3991%09red
Cytokine-cytokine receptor interaction	KEGG PATHWAY	hsa04060	1	294	0.66901	0.68722	IL13	http://www.genome.jp/kegg-bin/show_pathway?hsa04060/hsa:3596%09red
MAPK signaling pathway	KEGG PATHWAY	hsa04010	1	295	0.670252	0.68722	HSPA1L	http://www.genome.jp/kegg-bin/show_pathway?hsa04010/hsa:3305%09red
PI3K-Akt signaling pathway	KEGG PATHWAY	hsa04151	1	354	0.735856	0.745054	EIF4E	http://www.genome.jp/kegg-bin/show_pathway?hsa04151/hsa:1977%09red
Pathways in cancer	KEGG PATHWAY	hsa05200	1	530	0.863904	0.863904	IL13	http://www.genome.jp/kegg-bin/show_pathway?hsa05200/hsa:3596%09red
