# Supplementary material for: Infertility network and hub genes for nonobstructive azoospermia utilizing integrative analysis
Source: Aging (Albany NY). 2021 Feb 17;13(5):7052–66. doi: 10.18632/aging.202559 (PMC7993690; doi:10.18632/aging.202559)
Supplement: Supplementary Table 4 [file aging-13-202559-s005.xlsx]

## Sheet: Subcluster1
Supplementary Table 4. The summary of hub gene sets from the 3 subclusters.
Gene ID
RPE
APBB3
DDX56
HSF1
ZNF213
TMUB2
PSMD3
PRPF40B
MAP3K14
MTA1
SLC4A11
BABAM1
USF3
GDPD5
KIF17
GNG3
CBR4
ZFPL1
NUTM1
ARFGAP1
DHX34
EVI5L
ANAPC2
FBXO9
USP20
SMG9
ZBTB48
CHD5
GTF2F1
CCER1
TBL3
KLC4
VARS1
UBXN6
TMEM108
SPTBN2
ZNF653
TAF6
HGS
GAK
SEPTIN4
ZBTB17
PREPL
FLII
POLR2E
SYMPK
FZR1
ZSWIM8
ZC3H3
BAP1
PLEKHM2
GNL1
PIGQ
EEF1A1
SIRT7
MAP1S
ELL
CYTH2
COASY
ACTN3
RPS3A
INTS1
RAD23A
MIRLET7F1

## Sheet: Subcluster2
Gene ID
ARHGEF39
PPP6R2
C20orf96
E2F7
MIRLET7G
EWSAT1
PARP6
ZNF384
CCDC189

## Sheet: Subcluster3
Gene ID
CASC4
OSTC
RCCD1
EEFSEC
